# Supplementary material for: Multiplex PCR-Based Nanopore Sequencing and Epidemiological Surveillance of Hantaan orthohantavirus in Apodemus agrarius, Republic of Korea
Source: MDPI journal article supplement (doi:10.3390/v13050847), 2021-05-06
Supplement: s1 [file s1]

**Table S1.** GenBank accession numbers of Hantaan virus sequences obtained in this study.

| Sample   | MiSeq platform |          |          | MinION platform |          |          |
|----------|----------------|----------|----------|-----------------|----------|----------|
|          | L              | M        | S        | L               | M        | S        |
| Aa19-36  | MW796122       | MW796134 | MW796146 | MW796158        | MW796170 | MW796182 |
| Aa19-38  | MW796123       | MW796135 | MW796147 | MW796159        | MW796171 | MW796183 |
| Aa19-39  | MW796124       | MW796136 | MW796148 | MW796160        | MW796172 | MW796184 |
| Aa19-57  | MW796125       | MW796137 | MW796149 | MW796161        | MW796173 | MW796185 |
| Aa19-89  | MW796126       | MW796138 | MW796150 | MW796162        | MW796174 | MW796186 |
| Aa19-144 | MW796127       | MW796139 | MW796151 | MW796163        | MW796175 | MW796187 |
| Aa19-152 | MW796128       | MW796140 | MW796152 | MW796164        | MW796176 | MW796188 |
| Aa19-153 | MW796129       | MW796141 | MW796153 | MW796165        | MW796177 | MW796189 |
| Aa19-167 | MW796130       | MW796142 | MW796154 | MW796166        | MW796178 | MW796190 |
| Aa19-233 | MW796131       | MW796143 | MW796155 | MW796167        | MW796179 | MW796191 |
| Aa19-236 | MW796132       | MW796144 | MW796156 | MW796168        | MW796180 | MW796192 |
| Aa19-278 | MW796133       | MW796145 | MW796157 | MW796169        | MW796181 | MW796193 |

**Table S2.** Topography and GPS coordinates of the trapping sites.

| Trapping site        |                                               | Topography                                                              | GPS coordinates            |
|----------------------|-----------------------------------------------|-------------------------------------------------------------------------|----------------------------|
| Gyeonggi<br>Province | Paju                                          | Jeogam-ri<br>fields, hills, and mountains                               | 37°58'52.1"N 126°59'49.3"E |
|                      | Pocheon                                       | Jangam-ri<br>fields, unmanaged grasses, and mountains                   | 38°3'40"N 127°21'42"E      |
|                      |                                               | Jail-ri<br>fields, unmanaged grasses, and herbaceous vegetations        | 38°6'51"N 127°17'58"E      |
|                      | Pyeongtaek                                    | Jeokbong-ri<br>sloping hillsides, herbaceous vegetations, and forests   | 37°4'46.21"N 127°2'15.65"E |
|                      |                                               | Pyeongseong-ri<br>fields, unmanaged grasses, and herbaceous vegetations | 36°57'35"N 127°3'39"E      |
|                      | Yeoncheon                                     | Hyunga-ri<br>herbaceous vegetations and farmlands                       | 38°7'2.9"N 127°4'27"E      |
|                      |                                               | Dongi-ri<br>fields, unmanaged grasses, and herbaceous vegetations       | 38°1'3"N 126°59'31"E       |
|                      |                                               | Ohkye-ri<br>mountains and forests                                       | 38°7'25"N 127°4'5"E        |
|                      | Yeoncheon                                     | Sang-ri<br>mountains and forests                                        | 38°8'4"N 127°3'37"E        |
|                      |                                               | Yangwon-ri<br>fields, unmanaged grasses, and herbaceous vegetations     | 37°59'47"N 127°2'3"E       |
|                      |                                               | Bugok-ri<br>fields, unmanaged grasses, and herbaceous vegetations       | 38°3'52"N 127°8'58"E       |
|                      |                                               | Dosin-ri<br>fields, unmanaged grasses, and herbaceous vegetations       | 38°9'31"N 127°5'51"E       |
| Gangwon<br>Province  | Cheorwon                                      | Eupnae-ri<br>fields, unmanaged grasses, and herbaceous vegetations      | 38°18'00"N 127°27'33"E     |
|                      |                                               | Munhye-ri<br>herbaceous vegetations and farmlands                       | 38°11'18"N 127°22'2"E      |
|                      |                                               | Dochang-ri<br>fields, hills, forests, and mountains                     | 38°15'27"N 127°21'25"E     |
|                      |                                               | Chungyang-ri<br>farmlands and mountains                                 | 38°15'2"N 127°21'56"E      |
|                      |                                               | Gwanu-ri<br>farmlands and herbaceous vegetations                        | 38°14'15.4"N 127°13'35.2"E |
|                      | Chuncheon                                     | Gamjeong-ri<br>farmlands, herbaceous vegetations, and mountains         | 37°54'4"N 127°48'27"E      |
|                      |                                               | Sinchon-ri<br>farmlands, herbaceous vegetations, and mountains          | 37°51'10"N 127°47'32"E     |
|                      |                                               | Jinae-ri<br>fields, hills, and mountains                                | 37°57'45.8"N 127°42'54.4"E |
|                      | Chuncheon                                     | Balsan-ri<br>farmlands, unmanaged grasses, and herbaceous vegetations   | 37°57'45.8"N 127°45'4.5"E  |
|                      |                                               | Yulmun-ri<br>hills and herbaceous vegetations                           | 37°55'32.2"N 127°44'34.8"E |
| Hwacheon             | Pyungsan-ri<br>fields, forests, and mountains | 38°8'28"N 127°44'15"E                                                   |                            |

**Table S3.** Results of MiSeq sequencing from rodent lung tissues by viral RNA copy number of Hantaan virus (HTNV) collected in Gyeonggi and Gangwon Provinces, ROK, 2019.

| Viral RNA<br>copy number<br>(Copies/ $\mu$ L) | Sample   | Site      | Anti-HTNV<br>IgG titer | Nested<br>RT-PCR | Ct<br>value | HTNV genomes, % coverage |           |           |
|-----------------------------------------------|----------|-----------|------------------------|------------------|-------------|--------------------------|-----------|-----------|
|                                               |          |           |                        |                  |             | L segment                | M segment | S segment |
| $10^4$ to $10^5$                              | Aa19-233 | Cheorwon  | 1:64 <sup>a</sup>      | Pos              | 20.5        | 100                      | 100       | 100       |
|                                               | Aa19-278 | Cheorwon  | 1:32 <sup>a</sup>      | Pos              | 22.2        | 100                      | 100       | 100       |
| $10^2$ to $10^3$                              | Aa19-236 | Cheorwon  | 1:32 <sup>a</sup>      | Pos              | 29.4        | 100                      | 100       | 100       |
|                                               | Aa19-36  | Cheorwon  | 1:512 <sup>b</sup>     | Pos              | 29.7        | 96.9                     | 100       | 100       |
| 10 to $10^2$                                  | Aa19-89  | Yeoncheon | 1:64 <sup>a</sup>      | Pos              | 31.8        | 98.9                     | 98.5      | 100       |
|                                               | Aa19-57  | Pocheon   | 1:8,096 <sup>b</sup>   | Pos              | 32.7        | 98.9                     | 98.5      | 100       |
|                                               | Aa19-167 | Yeoncheon | 1:256 <sup>a</sup>     | Pos              | 34.0        | 100                      | 98.6      | 100       |
|                                               | Aa19-38  | Cheorwon  | 1:16,384 <sup>b</sup>  | Pos              | 34.4        | 98.2                     | 98.3      | 100       |
|                                               | Aa19-153 | Hwacheon  | 1:4,096 <sup>b</sup>   | Pos              | 34.5        | 100                      | 98.5      | 100       |
|                                               | Aa19-152 | Hwacheon  | 1:512 <sup>a</sup>     | Pos              | 36.4        | 95.6                     | 98.3      | 100       |
| 1 to 10                                       | Aa19-144 | Hwacheon  | 1:256 <sup>b</sup>     | Pos              | 37.3        | 94.5                     | 93.8      | 100       |
| 0 to 1                                        | Aa19-39  | Cheorwon  | 1:512 <sup>b</sup>     | Pos              | 40.0        | 92.3                     | 94.1      | 100       |

HTNV, Hantaan virus; IgG, immunoglobulin G; nested RT-PCR, nested reverse transcription-polymerase chain reaction; Ct, cycle threshold; Aa, *Apodemus agrarius*; Pos, Positive; Neg, Negative; <sup>a</sup>; IFA test was performed from heart fluids; <sup>b</sup>; IFA test was performed from sera.

**Table S4.** Summary of mapped reads and depth of coverages for Hantaan virus by amplicon-based NGS in MiSeq platform.

| Viral RNA<br>copy number<br>(Copies/ $\mu$ L) | Sample             | Total reads    | Reads mapped to<br>reference/Total reads<br>(%) | L segment                        |                      | M segment                        |                      | S segment                        |                      |
|-----------------------------------------------|--------------------|----------------|-------------------------------------------------|----------------------------------|----------------------|----------------------------------|----------------------|----------------------------------|----------------------|
|                                               |                    |                |                                                 | Reads mapped<br>to reference (%) | Depth of<br>coverage | Reads mapped<br>to reference (%) | Depth of<br>coverage | Reads mapped<br>to reference (%) | Depth of<br>coverage |
| 10 <sup>4</sup> to 10 <sup>5</sup>            | Aa19-233           | 1,630,766      | 1,575,693 (96.6)                                | 518,542 (31.8)                   | 9,687.1              | 614,309 (37.7)                   | 20,566.1             | 442,842 (27.2)                   | 31,539.4             |
|                                               | Aa19-278           | 1,381,944      | 1,343,293 (97.2)                                | 537,253 (38.9)                   | 9,976.4              | 549,724 (39.8)                   | 18,126.3             | 256,316 (18.5)                   | 18,234.5             |
| 10 <sup>2</sup> to 10 <sup>3</sup>            | Aa19-236           | 2,578,890      | 2,325,129 (90.2)                                | 784,074 (30.4)                   | 14,644.8             | 750,025 (29.1)                   | 25,143.6             | 791,030 (30.7)                   | 56,569.0             |
|                                               | Aa19-36            | 290,576        | 284,457 (97.9)                                  | 100,494 (34.6)                   | 1,880.4              | 103,340 (35.6)                   | 3,496.8              | 80,623 (27.7)                    | 5,790.1              |
| 10 to 10 <sup>2</sup>                         | Aa19-89            | 210,878        | 206,764 (98.0)                                  | 73,586 (34.9)                    | 1,377.1              | 76,690 (36.4)                    | 2,588.3              | 56,488 (26.8)                    | 4,031.3              |
|                                               | Aa19-57            | 323,856        | 315,500 (97.4)                                  | 100,682 (31.1)                   | 1,880.9              | 123,168 (38.0)                   | 4,128.8              | 91,650 (28.3)                    | 6,517.6              |
|                                               | Aa19-167           | 1,176,050      | 1,131,359 (96.2)                                | 379,829 (32.3)                   | 7,113.7              | 403,430 (34.3)                   | 13,581.6             | 348,100 (29.6)                   | 24,985.6             |
|                                               | Aa19-38            | 308,620        | 302,858 (98.1)                                  | 95,107 (30.8)                    | 1,783.9              | 117,222 (38.0)                   | 3,965.8              | 90,529 (29.3)                    | 6,467.0              |
|                                               | Aa19-153           | 278,190        | 267,345 (96.1)                                  | 87,679 (31.5)                    | 1,630.0              | 105,837 (38.0)                   | 3,542.9              | 73,829 (26.5)                    | 5,165.2              |
|                                               | Aa19-152           | 441,564        | 415,477 (94.1)                                  | 105,904 (24.0)                   | 1,969.6              | 153,056 (34.7)                   | 5,067.1              | 156,517 (35.4)                   | 10,737.0             |
| 1 to 10                                       | Aa19-144           | 310,472        | 245,605 (79.1)                                  | 85,996 (27.7)                    | 1,572.9              | 78,116 (25.2)                    | 2,500.6              | 81,493 (26.2)                    | 5,793.7              |
| 0 to 1                                        | Aa19-39            | 629,654        | 386,490 (61.4)                                  | 54,677 (8.7)                     | 972.8                | 189,412 (30.1)                   | 5,864.4              | 142,401 (22.6)                   | 9,861.3              |
| <b>Total</b>                                  | <b>Average (%)</b> | <b>796,788</b> | <b>733,330.8 (92.0)</b>                         | <b>243,651.9 (30.6)</b>          | <b>4,540.8</b>       | <b>272,027.4 (34.1)</b>          | <b>9,047.7</b>       | <b>217,651.5 (27.3)</b>          | <b>15,474.3</b>      |

Aa, *Apodemus agrarius*; Ct, cycle threshold; L, large; M, medium; S, small.

The depth of coverage was determined by the number of mapped reads (read length  $\times$  number of reads matching the reference/reference genome size).
