# Supplementary figures and images for: Multiplex PCR-Based Nanopore Sequencing and Epidemiological Surveillance of Hantaan orthohantavirus in Apodemus agrarius, Republic of Korea
Source: MDPI journal article supplement (doi:10.3390/v13050847), 2021-05-06

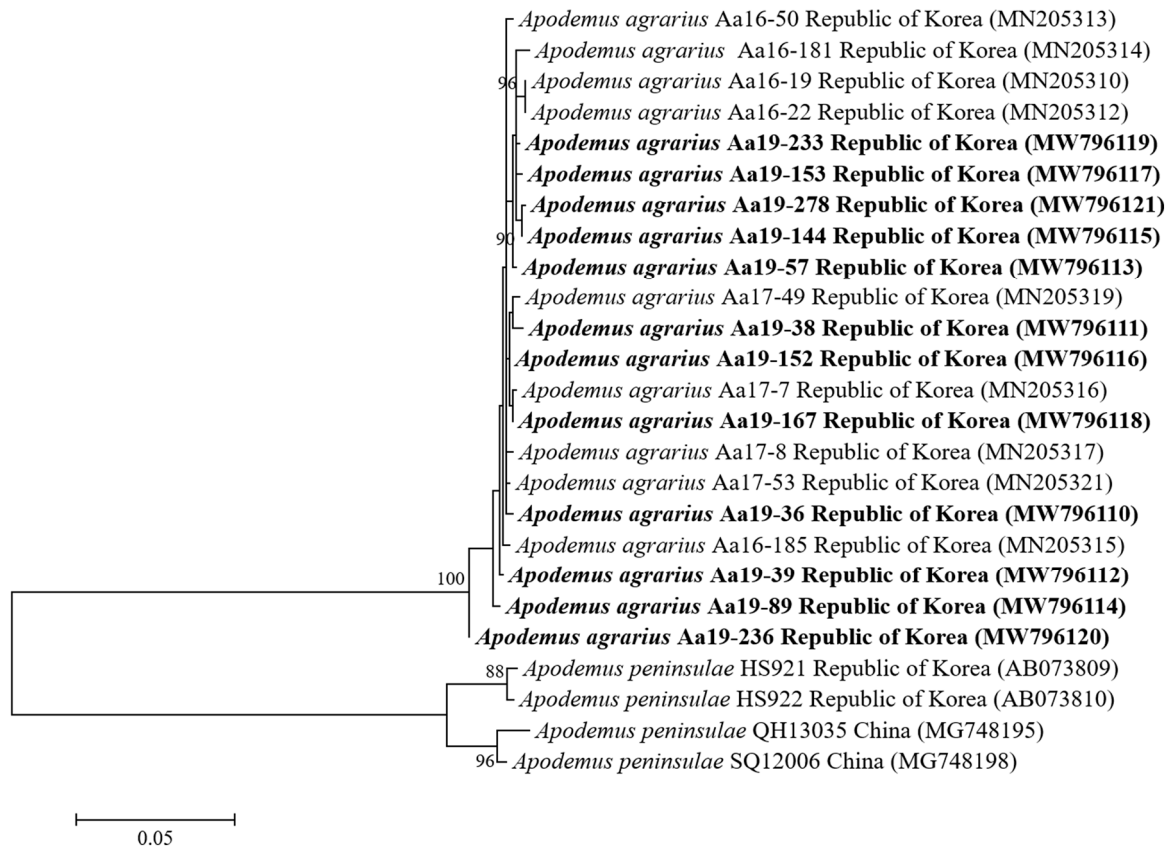

**Figure S1.** Phylogenetic analysis based on the mitochondrial cytochrome *b* gene of *Apodemus* spp.

Supplement: s1 [file s1]
